# Supplementary material
Source: publisher site journal article supplement (https://www.dovepress.com/article/298345)
Supplement: Supplementary file 1 [file get_supplementary_file.php]

## Supplementary Data

Prevalences of most common comorbid conditions in patients with COPD (occurring in  $\geq 2\%$  of patients in large European primary care database)

| Cluster                   | Condition                             | Italy <sup>1</sup> | Germany <sup>2</sup> | UK <sup>3</sup> | Spain <sup>4</sup> | Sweden <sup>5</sup> | Netherlands <sup>6</sup> |
|---------------------------|---------------------------------------|--------------------|----------------------|-----------------|--------------------|---------------------|--------------------------|
| <b>Number of patients</b> |                                       | <b>341,329</b>     | <b>146,141</b>       | <b>51,928</b>   | <b>27,617</b>      | <b>17,479</b>       | <b>14,603</b>            |
| Cardiovascular            | Hypertension                          |                    | 72.9                 | 35.3            | 55.6               | 56.3                | 35.2                     |
|                           | Hypertensive heart disease            |                    |                      |                 |                    | 2.61                |                          |
|                           | Heart failure                         | 7.9                | 20.0                 | 6.4             | 11.4               | 30.6                | 7.9                      |
|                           | Coronary artery disease               | 13.6               |                      | 20.8            | 9.7                |                     | 19.2                     |
|                           | Chronic ischemic heart disease        |                    |                      |                 |                    | 19.7                |                          |
|                           | Myocardial infarction                 |                    | 3.0                  |                 |                    | 13.4                |                          |
|                           | Angina pectoris                       |                    |                      |                 |                    | 18.9                |                          |
|                           | Atherosclerosis                       |                    |                      |                 | 2.2                |                     |                          |
|                           | Other forms of heart disease          | 23.1               |                      |                 |                    |                     |                          |
|                           | Atrial fibrillation                   |                    |                      | 5.9             |                    |                     | 7.5                      |
|                           | Cardiac arrhythmias                   | 15.9               |                      |                 | 14.4               |                     |                          |
|                           | Heart valve disease                   |                    |                      |                 | 4.9                |                     | 3.9                      |
|                           | Peripheral vascular disease           |                    |                      | 6.7             |                    |                     | 14.3                     |
|                           | Pulmonary embolism                    |                    |                      |                 |                    | 4.2                 |                          |
|                           | Diseases of the pulmonary circulation | 2.1                |                      |                 |                    |                     |                          |
|                           | Phlebitis and thrombophlebitis        |                    |                      |                 |                    | 6.5                 |                          |
|                           | Venous insufficiency                  |                    |                      |                 |                    |                     | 2.4                      |
| Varicose veins            |                                       |                    |                      |                 | 15.1               |                     |                          |
| Cerebrovascular           | Stroke & transient ischaemic attack   |                    |                      | 8.3             |                    | 13.2                | 9.7                      |
|                           | Transient ischaemia                   |                    | 2.54                 |                 |                    |                     |                          |
|                           | Brain infarct                         |                    | 2.73                 |                 |                    |                     |                          |
|                           | Stroke, other                         |                    | 2.33                 |                 |                    |                     |                          |
|                           | Other cerebrovascular syndrome        |                    |                      |                 | 9.9                |                     |                          |
| Respiratory               | Astma                                 |                    |                      | 21.4            |                    |                     | 8.5                      |

|                  |                                               |      |      |      |      |      |      |
|------------------|-----------------------------------------------|------|------|------|------|------|------|
|                  | Bronchiectasis                                |      |      | 1.9  |      |      | 2.8  |
|                  | Other respiratory diseases                    |      |      |      | 9.5  |      |      |
| Digestive        | Dyspepsia, gastroesophageal reflux            | 19.5 |      | 13.7 | 2.4  |      | 12.6 |
|                  | Diverticular disease of intestine             |      |      | 8.2  | 4.2  |      | 3.9  |
|                  | Constipation                                  |      |      | 8.4  |      |      |      |
|                  | Irritable bowel syndrome                      |      |      | 6.4  |      |      | 2.8  |
| Hepato           | Cirrhosis                                     |      |      |      | 1.9  |      |      |
| Endocrine        | Diabetes                                      | 18.7 | 28.4 | 12.2 | 22.1 |      | 17.3 |
|                  | Dyslipidemia                                  |      |      |      |      |      | 11.5 |
|                  | Thyroid disorder                              |      |      | 10.0 | 7.9  |      | 5.6  |
|                  | Adipositas/Obesity                            |      |      |      | 15.9 |      | 4.4  |
|                  | Other endocrine disorder                      |      |      |      | 3.2  |      |      |
| Musculoskeletal  | Osteoarthritis/ Degenerative joint disease    |      |      |      | 24.1 |      | 17.6 |
|                  | Osteoarthritis/Hip                            |      |      |      |      | 8.0  |      |
|                  | Osteoarthritis/Knee                           |      |      |      |      | 10.3 |      |
|                  | Osteoarthritis/first metocarpal joint         |      |      |      |      | 2.53 |      |
|                  | Osteoarthritis/Other                          |      |      |      |      | 9.9  |      |
|                  | Osteoporosis/osteopenia                       | 14.8 | 19.9 |      | 10.5 | 12.9 | 6.3  |
|                  | Inflammatory arthritis and related conditions |      |      | 11.2 |      |      | 3.7  |
|                  | Gout                                          |      |      |      |      |      | 2.0  |
| Renal/Urogenital | Chronic kidney disease                        |      | 13.1 | 7.4  | 3.4  |      | 9.5  |
|                  | Prostate disease                              |      |      | 3.3  | 22.1 |      | 1.2  |
|                  | Incontinence                                  |      |      |      | 9.1  |      |      |
|                  | Recurrent urinary tract infection             |      |      |      |      |      | 2.3  |
| Eye/Ear/Skin     | Visual impairment                             |      |      | 1.7  |      |      | 13.8 |
|                  | Glaucoma                                      |      |      | 2.9  |      |      | 2.2  |
|                  | Hearing loss                                  |      |      | 9.4  |      |      | 8.1  |
|                  | Psoriasis                                     |      |      |      |      |      | 4.6  |
|                  | Eczema                                        |      |      |      |      |      | 4.1  |
|                  | Skin ulcer                                    |      |      |      | 3.9  |      |      |
| Hematological    | Iron deficiency anemia                        |      |      |      | 8    |      |      |

|              |                                                                                    |      |      |      |      |      |     |
|--------------|------------------------------------------------------------------------------------|------|------|------|------|------|-----|
|              | Other hematological disorder                                                       |      |      |      | 3.9  |      |     |
| Neurological | Other neurological disorder                                                        |      |      |      | 5.5  |      |     |
|              | Neuritis                                                                           |      |      |      | 3.2  |      |     |
|              | Painful condition                                                                  |      |      | 24.5 |      |      |     |
| Neoplastic   | Pulmonary cancer                                                                   | 1.9  | 1.8  |      |      | 6.2  | 2.4 |
|              | Skin cancer                                                                        |      |      |      |      |      | 6.3 |
|              | A new cancer in last 5 years                                                       |      |      | 7.2  |      |      |     |
|              | Breast cancer                                                                      |      |      |      |      |      | 2.3 |
| Psychiatric  | Anxiety                                                                            |      |      | 11.2 | 3.6  | 14.3 | 4.3 |
|              | Depressive disorder                                                                |      | 30.5 | 19.1 | 14.5 | 23.6 | 5.6 |
|              | Persistent mood disorder                                                           |      | 2.6  |      |      |      |     |
|              | Dementia                                                                           |      |      | 2.1  |      |      | 1.7 |
|              | Sleep disorders                                                                    |      |      |      |      | 8.2  |     |
|              | Substance abuse                                                                    |      |      |      | 4.5  |      |     |
|              | Alcohol misuse                                                                     |      |      | 7.6  |      |      | 3.9 |
|              | Neurotic disorders, personality disorders and other non-psychotic mental disorders | 34.2 |      |      |      |      |     |

1. Cazzola, M., Bettoncelli, G., Sessa, E., Cricelli, C. & Biscione, G. Prevalence of comorbidities in patients with chronic obstructive pulmonary disease. *Respiration; international review of thoracic diseases* **80**, 112-119 (2010).
2. Greulich, T., *et al.* Prevalence of comorbidities in COPD patients by disease severity in a German population. *Respiratory medicine* **132**, 132-138 (2017).
3. Chetty, U., *et al.* Chronic obstructive pulmonary disease and comorbidities: a large cross-sectional study in primary care. *The British journal of general practice : the journal of the Royal College of General Practitioners* **67**, e321-e328 (2017).
4. Divo, M.J., *et al.* Chronic Obstructive Pulmonary Disease (COPD) as a disease of early aging: Evidence from the EpiChron Cohort. *PLoS one* **13**, e0193143 (2018).
5. Stallberg, B., *et al.* Real-world retrospective cohort study ARCTIC shows burden of comorbidities in Swedish COPD versus non-COPD patients. *NPJ primary care respiratory medicine* **28**, 33 (2018).
6. Westerik, J.A., *et al.* Associations between chronic comorbidity and exacerbation risk in primary care patients with COPD. *Respiratory research* **18**, 31 (2017).
